# Supplementary material
Source: publisher figshare collection journal article supplement (https://asha.figshare.com/articles/dataset/_/18862292)
Supplement: Supplementary file 1 [file 1]

## Sheet: Sheet1
Supplemental material, Smith et al., “Dysphagia and Quality of Life, Participation, and Inclusion Experiences and Outcomes for Adults and Children With Dysphagia: A Scoping Review,” Perspectives, https://doi.org/10.1044/2021_PERSP-21-00162
Supplemental Material S3. Description of included studies.
References and type of study	Relevant aim	Number of participants (N), group, age, and cause of dysphagia	QoL assessment used/ data collection tool	Treatment received (treatment group)	QATSDD score (%)
(Gustafsson & Theorell, 1995) QUANT Cross-sectional (Child)	Dysphagia management strategies.	87 people with dysphagia; 16-36 years; cause not specified.	Questionnaire	-	33/42 (79%)
(Mahant et al., 2011) QUAL Case Series (Child)	Impact of GJT or fundoplication.	16 parents of children with GJT or fundoplication and neurological impairment.	Interviews	GJT and fundoplication tube feeding.	34/42 (81%)
(Malandraki et al., 2014) QUANT Case Study (Child)	Effectiveness of therapy via telehealth.	1 child 6 years; Optiz BBB/G Syndrome and Asperger’s Syndrome.	EAT-10	Intensive paediatric swallowing telepractice program. One-hour sessions twice a week.	31/42 (74%)
(Remijn et al., 2019) QUAL Cross-sectional (Child)	How dysphagia with CP impacts participation.	10 participants aged 15-23; CP.	Interviews	-	30/42 (71%)
(Alali et al., 2018) QUANT Cross-sectional	Impact of dysphagia on QoL.	103 adults with MS	SWAL-QoL and EAT-10	-	36/42 (86%)
(Arslan et al., 2019) QUANT Cross-sectional	Impact of dysphagia on QoL.	84 adults with a neurological disorder	SWAL-QoL and EAT-10	-	22/42 (52%)
(Aruga et al., 2018) QUANT Case Series	Usefulness of Kuchi-kara Taberu Index Chart	3 adults with dysphagia; mixed causes	Kuchi-kara Taberu Index	-	20/42 (50%)
(Balandin et al., 2009) QUAL Cross-sectional	People’s experiences with dysphagia.	32 adults with CP	Interviews	-	29/42 (69%)
(Byeon, 2019) QUANT Cross-sectional	Factors impacting swallowing QoL.	142 adults with age related dysphagia.	SWAL-QoL	-	32/42 (76%)
(Carlozzi et al., 2016) QUANT Diagnostic Accuracy test	Swallowing QoL test for Huntington’s Disease.	507 adults with Huntington’s disease	HDQLIFE Measure	-	38/42 (90%)
(Carlsson et al., 2004) QUAL Case series	Experiences of dysphagia after a CVA.	3 adults with dysphagia after CVA	Interviews and mealtime observations	-	27/42 (64%)
(Carneiro et al., 2014) QUANT Case-control	Swallowing QoL in PD	62 with PD and 41 controls.	SWAL-QoL	-	32/42 (76%)
(Chen et al., 2009) QUANT Cross-sectional	Dysphagia and QoL in a geriatric population.	107 adults with age related dysphagia	MDADI and SF-12	-	32/42 (76%)
(Da Costa Franceschini & Mourao, 2015) QUANT Cross-sectional	Dysphagia and QoL in ALS.	17 adults with ALS	SWAL-QoL	-	33/42 (79%)
(de Faria Gaspar et al., 2015) QUANT Cross-sectional	QoL and dysphagia after CVA.	35 adults with dysphagia (9 tube fed); CVA	SWAL-QoL	-	31/42 (74%)
(Diniz et al., 2018) QUANT Diagnostic case control	Assessment for swallowing QoL in PD.	140 adults with dysphagia; PD, 47 controls.	SWAL-QoL	-	35/42 (83%)
(Ekberg et al., 2002) Mixed Cross-sectional	Effects of dysphagia on QOL.	360 adults with dysphagia; mixed causes; 28 health professionals.	DGH Scale and interviews	-	25/48 (52%)
(Eslick & Talley, 2008) QUANT Cross- sectional	Impact of dysphagia on the community.	672 adults with dysphagia; mixed causes.	CPQ	-	35/42 (83%)
(Farri et al., 2007) QUANT Cross-sectional	Impact of dysphagia on QoL.	73 adults with dysphagia from surgery.	DGH Scale	-	21/42 (50%)
(Finger et al., 2019) QUANT Cross-sectional	Onset of patient reported dysphagia symptoms.	268 adults with dysphagia; mixed causes.	EAT-10	-	34/42 (81%)
(Hellden et al., 2018) QUAL Cross-sectional	Experiences of dysphagia after CVA.	5 adults with dysphagia; CVA.	Interviews		33/42 (79%)
(Hewett et al., 2016) QUANT Case-control	QoL in people with EOE.	44 adults with dysphagia; EOE; 44 controls.	EOE Adult Quality of Life Questionnaire	-	33/42 (79%)
(Hong & Yoo, 2017) QUANT Cross-sectional	Swallowing QoL in patients with CVA.	79 adults with dysphagia; CVA; (n= 35 non-oral intake).	SWAL-QoL	-	25/42 (60%)
(Jacobsson et al., 2000) Mixed Case-control	Experiences of eating after a CVA.	30 adults; CVA; 15 controls.	Interviews and mealtime observations.	-	24/48 (50%)
(Johansson & Johansson, 2009) QUAL Cross-sectional	Experiences of relatives involved with dysphagia.	9 relatives of adults with dysphagia; mixed causes.	Interviews	-	31/42 (74%)
(Kim et al., 2005) QUANT Cohort study	Swallowing of young and older people with CVA.	96 young CVA onset participants, 160 old CVA onset participants.	SS-QoL	-	39/42 (93%)
(Klinke et al., 2014) QUAL Cross-sectional	Experiences of dysphagia after CVA.	7 adults with dysphagia; CVA.	Interviews	-	30/42 (71%)
(Klugman & Ross, 2002) Mixed Cross-sectional	Perceptions of dysphagia and their impact on QoL.	30 adults; MS.	Questionnaire	-	28/48 (67%)
(LaDonna et al., 2016) QUAL Cross-sectional	Experiences of relatives living with people with dysphagia.	6 relatives of adults with dysphagia; DM1.	Interviews	-	32/42 (76%)
(Leow et al., 2010) QUANT Cross-sectional	Impact of dysphagia on QoL for elderly and people with PD.	32 adults with PD, 16 elderly people, 16 young controls.	SWAL-QoL	-	31/42 (74%)
(Luchesi & Silveira, 2018) Mixed Case series	The importance of oral feeding in ALS.	4 adults; ALS.	Interview and SWAL-QoL	-	24/42 (57%)
(Manor et al., 2019) QUANT Case series	The link between FEES results and QoL.	14 adults; Huntington’s disease.	SWAL-QoL and SDQ	-	29/42 (69%)
(Martino et al., 2010)QUAL Cross-sectional	Psychological issues in people with acute or chronic dysphagia.	8 adults (3 acute and 5 chronic); dysphagia of mixed causes,	Focus groups	-	31/42 (74%)
(McAuliffe et al., 2017) QUANT Cross-sectional	Variables of participation in PD.	378 adults; PD.	CPIB	-	33/42 (79%)
(Medin, Larson, et al., 2010) QUAL Cross-sectional	Experiences of eating difficulties 3 months post CVA.	14 adults; 3 months post CVA.	Semi-structured interviews	-	33/42 (79%)
(Medin, Windahl, et al., 2010) QUAL Cross-sectional	Management of eating 6 months post CVA.	13 adults; 6 months post CVA.	Semi-structured interviews	-	31/42 (74%)
(Miller et al., 2006) QUAL Case series	How dysphagia impacts on QoL in PD.	37 adults; PD.	Interviews	-	28/42 (67%)
(Milte et al., 2017) QUAL Case series	Dining experiences for participants and carers.	19 adults;Cognitive impairment or dementia.	Interviews and focus groups	-	31/42 (74%)
(Moloney & Walshe, 2018) QUAL Case series	Experiences of dysphagia after a CVA.	10 adults with dysphagia; CVA.	Phenomenological analysis of published autobiographies	-	30/42 (71%)
(Moloney & Walshe, 2019)Mixed Cross-sectional	Speech-language pathology management QoL in dysphagia.	148 speech-language pathologists.	Original questionnaire	-	36/48 (75%)
(Morisaki, 2017) QUANT Cross-sectional	Swallow function and QoL.	225 adults with dysphagia; no specific cause.	DRACE and the SF-8	-	38/42 (90%)
(Nyberg et al., 2018) QUAL Cross-sectional	How people with dysphagia perceive mealtimes.	14 adults; mixed dysphagia causes.	Interviews and mealtime observations	-	29/42 (69%)
(Paris et al., 2013) QUANT Cohort study	Impact of dysphagia on QoL with ALS.	14 adults; ALS; 16 controls.	SWAL-QoL	-	28/42 (67%)
(Perry & McLaren, 2003)QUAL Cross-sectional	Perceptions to eating after a CVA.	206 people, includes 10 carers; CVA.	Semi-structured interviews		29/42 (69%)
(Pierce et al., 2016) QUANT Cross-sectional	Social, emotional, and functional impacts of dysphagia.	101 adults; Sjogren's syndrome.	MDADI, SF-36	-	31/42 (74%)
(Pitts et al., 2019) QUANT Cross-sectional	Link between lingual pressure and swallowing QoL in PD.	24 adults; PD; 24 controls.	SWAL-QoL, and the test of interior and tongue strength	-	28/42 (67%)
(Plowman-Prine et al., 2009) QUANT Cross-sectional	Swallowing QoL in IPD.	36 adults; IPD.	SWAL-QoL, and PDQ-39	-	22/42 (52%)
QUANT (Pontes et al., 2017) Cross-sectional	QoL of elderly with dysphagia after a CVA.	35 participants; CVA.	SWAL-QoL	-	24/42 (57%)
(Printza et al., 2020) QUANT Cross-sectional	Dysphagia perceptions, and QoL in MS.	108 adults (n = 27 with dysphagia); MS.	SWAL-QoL, EAT-10, and DYMUS	-	32/42 (76%)
(Roy et al., 2007) QUANT Cross-sectional	Socioemotional effects of dysphagia.	117 participants, 44 with dysphagia; mixed causes.	MDADI	-	28/42 (67%)
(Roy et al., 2018) QUANT Cross-sectional	QOL and dysphagia in Rheumatoid Arthritis.	100 participants; Rheumatoid Arthritis.	MDADI and the SF-36		32/42 (76%)
(Shune & Linville, 2019) QUAL Cross-sectional	Mealtime safety and enjoyment in dysphagia.	3 residents with dysphagia; mixed causes; 3 family members, 6 nurses, 3 dietary staff, 3 speech-language pathologists, 3 occupational therapists.	Interviews	-	36/42 (86%)
(Song et al., 2020) QUANT Case-series	Dysphagia in X linked dystonia parkinsonism and QoL.	34 adults; X linked dystonia parkinsonism.	SWAL-QoL	-	29/42 (69%)
(Tabor et al., 2016) QUANT Case-series	Dysphagia impacts on QoL in ALS.	81 adults; ALS.	SWAL-QoL and ALSFRS-R	-	24/42 (57%)
(Tibbling & Gustafsson, 1991) QUANT Cohort-study	Dysphagia impacts on QoL in the elderly.	796 adults; dysphagia of no specific cause.	Questionnaire	-	28/42 (67%)
(Turley & Cohen, 2009) QUANT Cross-sectional	QoL impacts of dysphagia in the elderly.	248 adults with dysphagia; cause not specified.	VRQOL and CES-D	-	30/42 (71%)
(van Hooren et al., 2016) QUANT Case series	Swallowing-related QoL and IPD.	100 adults; IDP.	MDADI, DSS and VHI	-	31/42 (74%)
(Verdonschot et al., 2016) QUANT Cohort-study	Link between dysphagia and affective symptoms.	107 adults; mixed dysphagia causes.	HADS, FEES, and DSS	-	27/42 (64%)
(Verdonschot et al., 2013) QUANT Cohort-study	Severity of anxiety and depression in dysphagia.	96 adults; mixed dysphagia causes.	HADS, FEES, DSS, MDADI, and FOIS	-	30/42 (71%)
(Vogel et al., 2014) QUANT Cohort study	Dysphagia and QoL in Friedreich ataxia.	36 adults; Friedreich ataxia.	AusTOMS	-	31/42 (74%)
(Vogel et al., 2017) Mixed Cohort-study	Dysphagia and QoL in POLG.	14 adults with POLG, 34 controls.	SWAL-QoL	-	29/42 (69%)
(Wegner et al., 2018) QUANT Cross-sectional	Swallowing-related QoL and COPD.	17 adults; COPD.	SWAL-QoL	-	31/42 (74%)
(Yi et al., 2019) QUANT Cross-sectional	Impact of dysphagia on QoL in CP.	117 adults with dysphagia; CP; 117 controls.	SWAL-QoL	-	31/42 (74%)
(Ang et al., 2019) QUAL Cross-sectional	Experiences with long-term enteral tube feeding.	9 adults with dysphagia; mixed causes; 9 carers.	Interviews	Enteral tube feeding.	38/42 (90%)
(Argolo et al., 2013) QUANT Case series	Motor swallowing exercises and QoL in PD.	15 adults; PD.	SWAL-QoL (prior to and post intervention)	Motor swallowing exercises.	28/42 (67%)
(Athukorala et al., 2014) QUANT Case series	Swallowing skill training in PD.	10 adults; PD.	SWAL-QoL (prior to and post intervention)	Task specific exercises with sEMG feedback.	34/42 (81%)
(Ayres et al., 2017) QUANT Cohort study	Effectiveness of manoeuvre application in PD.	24 adults (divided into 3 treatment grousp); PD.	SWAL-QoL (prior to and post intervention)	1. Chin tuck manoeuvre 2. Environmental and 3. Postural information vs control.	36/42 (86%)
(Ayres et al., 2016) QUANT Case series	QOL in PD before and after swallowing therapy.	10 adults; PD	SWAL-QoL (prior to and post intervention)	Chin tuck and guidelines on mealtime behaviours.	25/42 (60%)
(Bahceci et al., 2017) QUANT Case series	Relationship between swallowing and QoL after a CVA.	72 adults between 0-30 days post CVA.	SWAL-QoL (prior to and post intervention)	Oral hygiene, head/trunk positioning, oro-motor exercises, galvanic stimulation.	33/42 (79%)
(Chen et al., 2018) QUANT Cohort study	Effects of swallowing exercises on the QoL of oral cancer patients.	76 adults (split equally into control and experimental group); head/neck cancer.	MDADI and SSQ (prior to and post intervention)	1. Swallowing exercise education program. 2. Usual care.	37/42 (88%)
(Colpaert et al., 2017) QUANT Case series	Use SWAL-QoL to examine dysphagia in Zenker's diverticulum.	25 participants (17 had dysphagia); Zenker's diverticulum.	SWAL-QoL (prior to and post intervention)	Surgery to repair diverticulum.	34/42 (81%)
(Frost et al., 2018) QUANT Case series	Improve oral intake with traditional swallowing therapy and NMES.	10 adults with dysphagia; non-specified cause.	SWAL-QoL and EAT-10 Prior to, mid, and post intervention).	NMES and traditional swallowing therapy.	33/42 (79%)
(Hagglund et al., 2019) QUANT RCT	Impact of oral neuromuscular training on swallowing.	116 adults, dysphagia of non-specified cause.	SWAL-QoL (prior to and post intervention)	Neuromuscular training using the IQoro device.	33/42 (79%)
(Heijnen et al., 2012) QUANT Pseudo-RCT	Compare traditional swallowing therapy to NMES therapy and QoL.	88 adults (divided into 3 treatment groups); PD.	SWAL-QoL and MDADI (prior to and post intervention)	1. Traditional logopedic swallowing therapy 2. Traditional logopedic swallowing therapy and NMES at motor level. 3. Traditional logopedic swallowing therapy and NMES at sensory level.	36/42 (86%)
(Jin et al., 2020) QUANT Case series	Impact of CAECPM on swallowing QoL.	19 adults; CVA or lateral skull surgery.	CSWAL-QoL	CAECPM.	29/42 (69%)
(Kang et al., 2012) QUANT Non-RCT	Exercise program to improve swallowing after CVA.	50 adults (split equally into control and experimental group); CVA.	SS-QoL assessment (prior to and post intervention)	1. Traditional swallowing therapy 2. Oral, pharyngeal, laryngeal and respiratory exercises and traditional swallowing therapy.	30/42 (71%)
(Karagiannis & Karagiannis, 2014) QUANT Case series	Relationship between access to water and QoL.	16 adults with dysphagia; mixed causes.	4 question survey using faces rating chart	Fraizier Rehabilitation Centre Free Water Protocol and thickened fluids.	31/42 (74%)
(Kelly et al., 2013) QUANT Case series	QoL after botulinum toxin injections.	49 adults with UES.	EAT-10 (prior to and post intervention)	Cricopharyngeal botulinum toxin injections.	29/42 (69%)
(Liu et al., 2018) QUANT RCT	Compare nape acupuncture and rehabilitative swallowing therapy impacts on QoL.	100 adults (split equally into control and experimental group); pseudobulbar palsy.	SWAL-QoL (prior to and post intervention)	1. Nape acupuncture and rehabilitative swallowing training. 2. Rehabilitative swallowing training.	32/42 (76%)
(Liu et al., 2019) QUANT RCT	Impact of Gao nape acupuncture and swallowing training after a CVA.	100 adults (split equally into control and experimental group); CVA.	SWAL-QoL (prior to and post intervention)	1. Gao’s nape acupuncture and rehabilitative swallowing training. 2. Rehabilitative swallowing training.	26/42 (62%)
(Malandraki et al., 2016) QUANT Case series	Impact on intensive dysphagia rehabilitative training on swallowing.	10 adults; neurological disease or injury.	EAT-10 (prior to and post intervention)	Intensive dysphagia rehabilitative training protocol.	32/42 (76%)
(Manor et al., 2013) QUANT RCT	Compare VAST to traditional swallowing therapy.	42 adults, (split equally into control and experimental group); PD.	SWAL-QoL (prior to and post intervention)	1. VAST. 2. Traditional dysphagia therapy.	30/42 (71%)
(Moon et al., 2018) QUANT RCT	Impact of TPSAT on QoL after a CVA.	16 adults (split equally into control and experimental group); CVA.	SWAL-QoL (prior to and post intervention)	1. TPSAT and traditional swallowing therapy. 2. Traditional swallowing therapy.	36/42 (86%)
(Reyes et al., 2015) QUANT RCT	Effects of respiratory muscle training on swallowing.	18 adults (split equally into control and experimental group); Huntington’s disease	SWAL-QoL (prior to and post intervention)	Inspiratory and expiratory muscle training against progressive (experimental) or fixed (control) resistance.	32/42 (76%)
(Rogus-Pulia et al., 2016) QUANT Case series	Use of Swallow STRONG to improve swallowing QOL	56 adults; dysphagia of no specified cause.	SWAL-QoL (prior to, mid, and post intervention)	Swallow STRONG using isometric progressive resistance oropharyngeal therapy.	32/42 (76%)
(Sanchez-Kuhn et al., 2019) QUANT Case study	tDCS with swallowing training after CVA.	1 adult; CVA.	SWAL-QoL (prior to and post intervention)	tDCS.	23/42 (55%)
(Seshadri et al., 2018)QUAL Cross-sectional	Texture modified diet with lifestyle.	20 adults; dysphagia of mixed causes.	Interviews and mealtime observations	Texture modified diet.	33/42 (79%)
(Stavroulakis et al., 2016) QUAL Cross-sectional	Gastrostomy experiences of patients and carers.	18 adults, 10 patients and 10 carers; MND	Interview three months post-surgery	Gastrostomy.	37/42 (88%)
(Sundstedt et al., 2016) QUANT Case control	Impact of deep brain stimulation on swallowing.	9 adults with PD; 9 healthy controls.	SWAL-QoL (prior to and post intervention)	Caudal zona incerta deep brain stimulation.	30/42 (71%)
(Tarlarini et al., 2019) QUANT Case-series	Taste changes and QoL in ALS	21 oral fed participants and 10 enteral tube fed participants; ALS.	UW-QOLQ	Device that provides selected flavours to foods.	30/42 (71%)
(Unluer et al., 2019) QUANT RCT	rTMS impacts on swallowing and QoL.	28 adults, 15 in experimental and 13 in control group; CVA.	SWAL-QoL (prior to and post intervention)	1. rTMS and traditional swallow therapy. 2. Traditional swallow therapy.	34/42 (81%)
(Verin et al., 2011) QUANT Case series	Use of SSTES to improve swallowing.	13 adults; neurological disorders.	SWAL-QoL (prior to and post intervention)	SSTES for six weeks.	26/42 (62%)
(Vieira et al., 2018) QUANT Non-RCT	Impact of texture modified diet on QoL.	25 adults, 12 at risk of dysphagia; CVA	SWAL-QoL (prior to and post intervention)	1. Traditional swallow therapy and texture modified food. 2. Traditional swallow therapy.	26/42 (61%)
(Xia et al., 2016) QUANT RCT	Acupuncture and traditional swallowing therapy for dysphagia.	124 adults, (split into control and experimental group); CVA.	SWAL-QoL (prior to and post intervention)	1. Acupuncture and traditional swallowing therapy. 2. Traditional swallowing therapy.	36/42 (86%)
(Zhang et al., 2016) QUANT RCT	NMES motor and sensory impacts on dysphagia.	82 adults (divided into 3 treatment groups); medullary infarction.	SWAL-QoL (prior to and post intervention)	1. Traditional swallow therapy. 2. Traditional swallow therapy and motor NMES. 3. Traditional swallow therapy and sensory NMES.	30/42 (71%)
(McHorney, Bricker, Kramer, et al., 2000) QUAL Cross-sectional	Conceptual foundation for the SWAL-QoL.	52 adults; dysphagia of mixed causes.	Focus groups	-	37/42 (88%)
(McHorney, Bricker, Robbins, et al., 2000) QUANT Diagnostic accuracy	SWAL-QoL reliability and range of skewness.	106 adults with mixed dysphagia causes.	SWAL-QoL	-	35/42 (83%)
(McHorney et al., 2002) QUANT Diagnostic case control	Report on reliability of SWAL-QoL and SWAL-CARE.	386 adults; dysphagia of mixed causes; 40 controls.	SWAL-QoL	-	37/42 (88%)
