# Supplementary material
Source: publisher figshare collection journal article supplement (https://asha.figshare.com/articles/dataset/_/18862292)
Supplement: Supplementary file 1 [file 1]

**Supplemental Material S5. Assessment items implemented for quality of life.**

| Assessment implemented                                                           | Study                                                                                                                                                                                                                                                                                                                                                                                                                                                                                                                                                                                                                                                                                                                                                                                                                                                                                                                                                                        |
|----------------------------------------------------------------------------------|------------------------------------------------------------------------------------------------------------------------------------------------------------------------------------------------------------------------------------------------------------------------------------------------------------------------------------------------------------------------------------------------------------------------------------------------------------------------------------------------------------------------------------------------------------------------------------------------------------------------------------------------------------------------------------------------------------------------------------------------------------------------------------------------------------------------------------------------------------------------------------------------------------------------------------------------------------------------------|
| Assessment items examining either quality of life or a domain of quality of life |                                                                                                                                                                                                                                                                                                                                                                                                                                                                                                                                                                                                                                                                                                                                                                                                                                                                                                                                                                              |
| SWAL-QoL                                                                         | Alali et al., 2018; Argolo et al., 2013; Arslan et al., 2019; Athukorala et al., 2014; Ayres et al., 2017; Ayres et al., 2016; Bahceci et al., 2017; Byeon, 2019; Carneiro et al., 2014; Colpaert et al., 2017; Da Costa Franceschini & Mourao, 2015; de Faria Gaspar et al., 2015; Diniz et al., 2018; Frost et al., 2018; Hagglund et al., 2019; Heijnen et al., 2012; Hong & Yoo, 2017; Jin et al., 2020; Leow et al., 2010; Liu et al., 2018; Liu et al., 2019; Luchesi & Silveira, 2018; Manor et al., 2013; Manor et al., 2018; Moon et al., 2018; Paris et al., 2013; Pitts et al., 2019; Plowman-Prine et al., 2009; Pontes et al., 2017; Printza et al., 2020; Reyes et al., 2015; Rogus-Pulia et al., 2016; Sanchez-Kuhn et al., 2019; Song et al., 2020; Sundstedt et al., 2016; Tabor et al., 2016; Unluer et al., 2019; Verin et al., 2011; Vieira et al., 2018; Vogel et al., 2017; Wegner et al., 2018; Xia et al., 2016; Yi et al., 2019; Zhang et al., 2016 |
| EAT-10                                                                           | Alali et al., 2018; Arslan et al., 2019; Finger et al., 2019; Frost et al., 2018; Kelly et al., 2013; Malandraki et al., 2016; Malandraki et al., 2014; Printza et al., 2020                                                                                                                                                                                                                                                                                                                                                                                                                                                                                                                                                                                                                                                                                                                                                                                                 |
| Kuchi-kara Taberu Index                                                          | Aruga et al., 2018                                                                                                                                                                                                                                                                                                                                                                                                                                                                                                                                                                                                                                                                                                                                                                                                                                                                                                                                                           |
| Disability-Goal-Handicap Scale                                                   | Ekberg et al., 2002; Farri et al., 2007                                                                                                                                                                                                                                                                                                                                                                                                                                                                                                                                                                                                                                                                                                                                                                                                                                                                                                                                      |
| Hospital Anxiety and Depression Scale                                            | Chen et al., 2018; Verdonschot et al., 2016                                                                                                                                                                                                                                                                                                                                                                                                                                                                                                                                                                                                                                                                                                                                                                                                                                                                                                                                  |
| Functional Oral Intake Scale                                                     | Verdonschot et al., 2013                                                                                                                                                                                                                                                                                                                                                                                                                                                                                                                                                                                                                                                                                                                                                                                                                                                                                                                                                     |
| Chest Pain Questionnaire                                                         | Eslick & Talley, 2008                                                                                                                                                                                                                                                                                                                                                                                                                                                                                                                                                                                                                                                                                                                                                                                                                                                                                                                                                        |
| Swallowing Disturbance Questionnaire                                             | Manor et al., 2018                                                                                                                                                                                                                                                                                                                                                                                                                                                                                                                                                                                                                                                                                                                                                                                                                                                                                                                                                           |
| Sydney Swallowing Questionnaire                                                  | Chen et al., 2018                                                                                                                                                                                                                                                                                                                                                                                                                                                                                                                                                                                                                                                                                                                                                                                                                                                                                                                                                            |
| Communicative Participation Item Bank                                            | McAuliffe et al., 2017                                                                                                                                                                                                                                                                                                                                                                                                                                                                                                                                                                                                                                                                                                                                                                                                                                                                                                                                                       |
| Dysphagia Risk Assessment for Community Dwelling Elderly                         | Morisaki, 2017                                                                                                                                                                                                                                                                                                                                                                                                                                                                                                                                                                                                                                                                                                                                                                                                                                                                                                                                                               |
| Short Form Health Survey (SF-8, SF-12, SF-36)                                    | Chen et al., 2009; Morisaki, 2017; Roy et al., 2018                                                                                                                                                                                                                                                                                                                                                                                                                                                                                                                                                                                                                                                                                                                                                                                                                                                                                                                          |
| M.D. Anderson Dysphagia Inventory                                                | Chen et al., 2009; Chen et al., 2018; Roy et al., 2007; Roy et al., 2018                                                                                                                                                                                                                                                                                                                                                                                                                                                                                                                                                                                                                                                                                                                                                                                                                                                                                                     |
| Australian Therapy Outcome Measures for Speech and Swallowing                    | Vogel et al., 2014                                                                                                                                                                                                                                                                                                                                                                                                                                                                                                                                                                                                                                                                                                                                                                                                                                                                                                                                                           |
| Voice Related Quality of Life                                                    | Turley & Cohen, 2009                                                                                                                                                                                                                                                                                                                                                                                                                                                                                                                                                                                                                                                                                                                                                                                                                                                                                                                                                         |
| Centre of Epidemiological Studies Depression Scale (CES-D)                       | Turley & Cohen, 2009                                                                                                                                                                                                                                                                                                                                                                                                                                                                                                                                                                                                                                                                                                                                                                                                                                                                                                                                                         |
| Condition specific assessments examining quality of life                         |                                                                                                                                                                                                                                                                                                                                                                                                                                                                                                                                                                                                                                                                                                                                                                                                                                                                                                                                                                              |
| Huntington Disease Health Related Quality of Life (HDQLIFE) Measure              | Carlozzi et al., 2016                                                                                                                                                                                                                                                                                                                                                                                                                                                                                                                                                                                                                                                                                                                                                                                                                                                                                                                                                        |
| The Eosinophilic esophagitis (EOE) Adult Quality of Life Questionnaire           | Hewett et al., 2016                                                                                                                                                                                                                                                                                                                                                                                                                                                                                                                                                                                                                                                                                                                                                                                                                                                                                                                                                          |
| Parkinson's Disease Questionnaire-39 (PDQ-39)                                    | Plowman-Prine et al., 2009                                                                                                                                                                                                                                                                                                                                                                                                                                                                                                                                                                                                                                                                                                                                                                                                                                                                                                                                                   |
| Stoke Specific Quality of Life assessment (SS-QoL)                               | Kang et al., 2012                                                                                                                                                                                                                                                                                                                                                                                                                                                                                                                                                                                                                                                                                                                                                                                                                                                                                                                                                            |
