# Supplementary material
Source: publisher figshare collection journal article supplement (https://asha.figshare.com/articles/dataset/_/18862292)
Supplement: Supplementary file 2 [file 1]

**Supplemental Material S4.** Analysis of review studies.

| Reference                | Aim                                            | Included studies                                                                            | Population included                                                                           | Limitations/gaps in the review                                                                                                                                                                                            |
|--------------------------|------------------------------------------------|---------------------------------------------------------------------------------------------|-----------------------------------------------------------------------------------------------|---------------------------------------------------------------------------------------------------------------------------------------------------------------------------------------------------------------------------|
| Carneiro et al., 2013    | SWAL-QoL and Parkinson's                       | 2 cohort studies                                                                            | People with dysphagia resulting from Parkinson's                                              | Only included 2 studies, included studies specifically about the SWAL-QoL and dysphagia resulting from Parkinson's.                                                                                                       |
| Jones et al., 2018       | HRQoL and oropharyngeal dysphagia              | 35 studies (31 case series and 4 pseudorandomized)                                          | People with oropharyngeal dysphagia; mixed causes of dysphagia: neck cancer, CVA, Parkinson's | Papers only included if in English, oesophageal dysphagia was excluded, and authors of included studies were not contacted.                                                                                               |
| Katzberg & Benatar, 2011 | PEG and QoL in ALS                             | 11 non-RCTs and 4 case control studies                                                      | People with ALS or MND                                                                        | Did not include dysphagia of other causes, and only looked at the impact of tube feeding.                                                                                                                                 |
| Klinke et al., 2013      | Views on eating difficulties after a CVA       | 33 case studies and case series studies                                                     | People with dysphagia after CVA                                                               | Quality of results was based on the types of analytical questions asked, and only included participants with dysphagia after CVA.                                                                                         |
| Langmore et al., 2006    | PEG and QoL in ALS                             | 11 case or cohort studies                                                                   | People with ALS or MND                                                                        | Uncontrolled studies not included, and only included studies where ALS/MND was the cause of dysphagia.                                                                                                                    |
| Li & Deng, 2019          | Acupuncture and traditional swallowing therapy | 17 RCTs                                                                                     | People with dysphagia post CVA                                                                | Heterogeneity and publication bias observed. The long-term curative effects of acupuncture combined with swallowing training could not be evaluated because all of the studies included reported only short-term effects. |
| Swan et al., 2015        | Texture-modified foods and HRQoL               | 8 studies (2 RCTs and 6 non-RCTs)                                                           | People with oropharyngeal dysphagia; mixed causes                                             | Small number of studies, the heterogeneity of population, the study design, lack of standardized terminology.                                                                                                             |
| Verdonschot et al., 2017 | Oropharyngeal dysphagia and depression/anxiety | 24 studies (15 cross sectional, 5 prospective, 2 retrospective, and 2 case control studies) | People with oropharyngeal dysphagia; mixed causes: CVA, cancer                                | Search strategy included mesh terms and limited free-text terms and grey literature was not included.                                                                                                                     |

*Note.* Amyotrophic lateral sclerosis (ALS), cerebrovascular accident (CVA), health related quality of life (HRQoL), motor neuron disease (MND), non-randomized control trial (non-RCT), percutaneous endoscopic gastrostomy (PEG) quality of life (QoL), randomized control trial (RCT) Swallowing Quality of Life Questionnaire (SWAL-QoL)
