# Supplementary material
Source: publisher figshare collection journal article supplement (https://asha.figshare.com/articles/dataset/_/18862292)
Supplement: Supplementary file 3 [file 1]

**Supplemental Material S6.** Studies found in August 2020.

| Study                   | Aim                                                                                                                    | Population                                                           | Method                                                                                       | Result                                                                                                                                           |
|-------------------------|------------------------------------------------------------------------------------------------------------------------|----------------------------------------------------------------------|----------------------------------------------------------------------------------------------|--------------------------------------------------------------------------------------------------------------------------------------------------|
| Byeon, 2020             | Effects of Mendelsohn manoeuvre and NMES on swallowing and QoL                                                         | <i>N</i> = 43, CVA                                                   | Swallow assessed using FDS and QoL assessed using SWAL-QoL                                   | Participants who had both NMES and Mendelsohn had highest FDS and SWAL-QoL scores than participants who had one therapy.                         |
| Chan et al., 2020       | QoL in patients with PD using the CSWAL-QoL                                                                            | <i>N</i> = 67, PD                                                    | The CSWAL-QoL and Geriatric Depression Scale to assess QoL and depression                    | Sleep, fatigue, eating duration and communication were the most severely affected by PD. Significant link between swallowing and depression.     |
| Covello et al., 2020    | Evaluate the oral health status, dysphagia, and QoL of people with MS                                                  | <i>N</i> = 101, MS                                                   | Assessed on DYMUS and the OHIP-14                                                            | 15% of people needed to pause when eating, 25% had difficulty swallowing. Dysphagia impacted on QoL "although not more than the disease itself." |
| Kim et al., 2019        | Meaning of life impacts on the relationship between depression and QoL in people with dysphagia?                       | <i>N</i> = 90, CVA, degenerative disease, TBI, or nervous disorder   | SWAL-QoL measured QoL, CES-D measured depression, and PIL measured meaning of life           | Meaning of life had mediating effect on the QoL and depression of people with dysphagia.                                                         |
| Padilla et al., 2019)   | Explore QoL in Hispanic New Mexicans with dysphagia                                                                    | <i>N</i> = 7, CVA, muscle weakness, CP, Guillain-Barré syndrome, TBI | SWAL-QoL, Neuro-QoL, interviews (interviews only with participants with acquired dysphagia). | QoL categorized as an emotional experience (themes: distrust, fear, frustration, acceptance, triggers, and impacts).                             |
| Pilz et al., 2020       | To describe swallowing related QoL in people with DM1 and examine its association with swallowing and disease severity | <i>n</i> = 75 with DM1, <i>n</i> = 25 controls; DM1                  | SWAL-QoL                                                                                     | SWAL-QoL scores were significantly lower for those with DM1 than controls.                                                                       |
| Ronnefarth et al., 2020 | Determine impacts of dysphagia in cerebellar ataxia patients on QoL                                                    | <i>N</i> = 119, cerebellar ataxia                                    | SWAL-QoL                                                                                     | Participants with dysphagia had significantly reduced QoL over those without dysphagia.                                                          |
| Shune & Namasivayam     | Type/extent of burden felt by older adults caring for their spouse with dysphagia                                      | <i>N</i> = 422 older adults with dysphagia and their spouse          | National Health and Aging Trends Survey (population-based survey)                            | Older adults caring for their partners with dysphagia were more likely to feel emotional burden. They also reported feelings of                  |

|                               |                                                                                           |                                                                                                         |                      |                                                                                                                                                                                                                                   |
|-------------------------------|-------------------------------------------------------------------------------------------|---------------------------------------------------------------------------------------------------------|----------------------|-----------------------------------------------------------------------------------------------------------------------------------------------------------------------------------------------------------------------------------|
| -MacDonald, 2020              |                                                                                           |                                                                                                         |                      | loneliness, depression, financial difficulties, and physical difficulties.                                                                                                                                                        |
| Swales et al., 2020           | Participation and psychological impacts of dysphagia and communication difficulties in PD | <i>N</i> = 78, PD                                                                                       | Mixed-methods survey | Emotional impacts of swallowing changes: frustration, annoyance, embarrassment, loneliness, depression, anxiety, self-consciousness, adjustment/ acceptance. "don't enjoy eating out as much...self-conscious in company" (p. 5). |
| Toledo-Rodríguez et al., 2019 | How QoL is perceived in people with neurogenic dysphagia in Chile                         | <i>n</i> = 27, neurogenic dysphagia (CVA, PD, HD, MS, Encephalocranial trauma), <i>n</i> = 113 controls | SWAL-QoL-CH (Chile)  | Participants with dysphagia presented with significant differences in all SWAL-QoL-CH domains.                                                                                                                                    |

*Note.* Centre of Epidemiological Studies Depression Scale (CES-D), cerebral palsy (CP), cerebrovascular accident (CVA), Chinese Version of the Swallowing Quality of Life Questionnaire (CSWAL-QoL), Myotonic Dystrophy (DM1), Dysphagia in Multiple Sclerosis (DYMUS), Functional Dysphagia Scale (FDS), Huntington Disease (HD), Oral Health Impacts Profile (OHIP-14), multiple sclerosis (MS), neuromuscular electrical stimulation (NMES), Quality of Life in Neurological Disorders (Neuro-QoL), Parkinson's Disease (PD), Purpose in Life Test (PIL), quality of life (QOL), Swallowing Quality of Life Questionnaire (SWAL-QoL), Swallowing Quality of Life Questionnaire- Chile (SWAL-QoL-CH), traumatic brain injury (TBI).
