# Supplementary material
Source: publisher figshare collection journal article supplement (https://asha.figshare.com/articles/dataset/_/18862292)
Supplement: Supplementary file 4 [file 1]

**Supplemental Material S1.** Medline search strategy for systematic review.

---

**Search terms**

---

1. dysphagia.mp. or Deglutition Disorders/
  2. deglutition disorder.mp.
  3. swallowing disorder.mp.
  4. choking.mp. or Airway Obstruction/
  5. Feeding Methods/ or feeding.mp.
  6. eating.mp. or Eating/
  7. swallowing impairment.mp.
  8. swallowing therapy.mp.
  9. quality of life.mp. or "Quality of Life"/
  10. enjoyment.mp.
  11. participation.mp. or Patient Participation/ or Community Participation/ or Stakeholder Participation/ or Social Participation/
  12. inclusion.mp.
  13. self-determination.mp. or Personal Autonomy/
  14. "Activities of Daily Living"/ or independence.mp.
  15. Personal Autonomy/ or autonomy.mp.
  16. community participation.mp.
  17. patient participation.mp.
  18. social inclusion.mp.
  19. social participation.mp. or Interpersonal Relations/
  20. Mental Health/ or wellbeing.mp.
  21. lifestyle.mp. or Life Style/
  22. Anxiety/ or avoidance.mp.
  23. distress.mp.
  24. depression.mp. or Depression/
  25. 1 or 2 or 3 or 4 or 5 or 6 or 7 or 8
  26. 9 or 10 or 11 or 12 or 13 or 14 or 15 or 16 or 17 or 18 or 19 or 20 or 21 or 22 or 23 or 24
  27. 25 and 26
-
